# Supplementary material for: Mutations of EGFR or KRAS and expression of chemotherapy-related genes based on small biopsy samples in stage IIIB and IV inoperable non-small cell lung cancer
Source: Springer Nature journal article supplement (doi:10.1007/s00432-014-1751-y), 2014-07-03
Supplement: MOESM1 [file 8519814]

**Supplementary data**

**Table 1 The sequences of ASPE primers used for the 56plex**

| Genes | Type | Universal tage –Primer, 5’→3’ |
| --- | --- | --- |
| EGFR | WT | ATACTTCATTCATTCATCAATTCA CCGAACGCACCGGAGC |
| Exon18 | G719A | ATACAATCTAACTTCACTATTACA GTGCCGAACGCACCGGAGG |
|  | G719C | CTTTAATCTACACTTTCTAACAAT CCGAACGCACCGGAGCA |
|  | G719S | ATACTACATCATAATCAAACATCA CCGAACGCACCGGAGCT |
| EGFR | WT | CTTCTCATTAACTTACTTCATAAT CTATCAAGGAATTAAGAGAAGC |
| Exon19 | E746-A750 (1) | TCAATTACTTCACTTTAATCCTTT AATTCCCGTCGCTATCAAAAC |
|  | E746-A750 (2) | CTTTTCATCAATAATCTTACCTTT TTCCCGTCGCTATCAAGACA |
|  | L747-E749 ins P | AAACAAACTTCACATCTCAATAAT CGTCGCTATCAAGGAACCAA |
|  | L747-A750 ins P | TCATTTCAATCAATCATCAACAAT CGTCGCTATCAAGGAACCAT |
|  | L747-T751 | TCAATCATCTTTATACTTCACAAT CGTCGCTATCAAGGAATCT |
|  | L747-T751 ins A | TTACTCAAAATCTACACTTTTTCA CCCGTCGCTATCAAGGCAT |
|  | L747-S752 | CTTTTTCAATCACTTTCAATTCAT CCGTCGCTATCAAGGAACAT |
|  | L747-S752 ins V | CAATATCATCATCTTTATCATTAC CCCGTCGCTATCAAGGTTC |
|  | L747-S752 ins D | AATCTACAAATCCAATAATCTCAT CCGTCGCTATCAAGGATCC |
|  | L747-S752 ins Q | ATCAAATCTCATCAATTCAACAAT CGTCGCTATCAAGGAACAG |
|  | L747-S752 ins S | TTCATAACTACAATACATCATCAT CGTCGCTATCAAGGAATCG |
|  | E749-S752 ins D | AAACTAACATCAATACTTACATCA CTATCAAGGAATTAAGAGATCC |
|  | E746-T751 ins T | TCAAAATCTCAAATACTCAAATCA TCCCGTCGCTATCAAGACC |
|  | E746-P753 ins VS | CTACTAATTCATTAACATTACTAC CCCGTCGCTATCAAGGTCT |
|  | E746-T751 ins Y | CTACAAACAAACAAACATTATCAA CCGTCGCTATCAAGGAACAA |
|  | E746-T751 ins A | TAACATTACAACTATACTATCTAC CCCGTCGCTATCAAGGCTT |
|  | E746-T750 ins AP | TATATACACTTCTCAATAACTAAC TCGCTATCAAGGCCCCAAC |
|  | E747-T751 ins V | CTTTTCATCTTTTCATCTTTCAAT CGTCGCTATCAAGGTATCT |
|  | L747-S752 ins E | CTTTAATCCTTTATCACTTTATCA CGTCGCTATCAAGGAACCG |
|  | R748-T751 ins LS | TTACCTTTATACCTTTCTTTTTAC CGCTATCAAGCTATCAAGCC |
| EGFR | WT (1) | TCAATTACCTTTTCAATACAATAC CACCGTGCAGCTCATCAC |
| Exon20 | WT (2) | TACACTTTCTTTCTTTCTTTCTTT AAGCCTACGTGATGGCCAG |
|  | T790M | TCATTTACCAATCTTTCTTTATAC CCACCGTGCAGCTCATCAT |
|  | S768I | AATCTAACAAACTCATCTAAATAC AAGCCTACGTGATGGCCAT |
|  | V769_D770 ins ASV | TACAAATCATCAATCACTTTAATC GATGGCCAGCGCCAGCGTG |
|  | D770_N771 ins G | TACATACACTAATAACATACTCAT GTGATGGCCAGCGTGGGT |
|  | H773_V774 ins H | CAATAAACTATACTTCTTCACTAA CGTGGACAACCCCCACCA |
| EGFR | WT (1) | TAATTATACATCTCATCTTCTACA CAAGATCACAGATTTTGGGCT |
| Exon21 | WT (2) | CTACTATACATCTTACTATACTTT GATTTTGGGCTGGCCAAACT |
|  | L858R (1) | CTTTTCAATTACTTCAAATCTTCA AAGATCACAGATTTTGGGCG |
|  | L858R (2) | CAATATACCAATATCATCATTTAC AGATCACAGATTTTGGGCGT |
|  | L861Q | CTACATATTCAAATTACTACTTAC GATTTTGGGCTGGCCAAACA |
| KRAS | WT (1) | AATCAATCTTCATTCAAATCATCA TTGTGGTAGTTGGAGCTGGT |
| Exon2 | WT (2) | AATCTTACCAATTCATAATCTTCA GTAGTTGGAGCTGGTGGC |
|  | G12A | CTTTTCAAATCAATACTCAACTTT TGGTAGTTGGAGCTGCT |
|  | G12C | TTCAATCATTCAAATCTCAACTTT TTGTGGTAGTTGGAGCTT |
|  | G12D | CTTTCTACATTATTCACAACATTA TTGTGGTAGTTGGAGCTGAT |
|  | G12R | TCATTTACTCAACAATTACAAATC TGTGGTAGTTGGAGCTCG |
|  | G12S | TCATAATCTCAACAATCTTTCTTT CTTGTGGTAGTTGGAGCTA |
|  | G12V | CAATTTACTCATATACATCACTTT TTGTGGTAGTTGGAGCTGTT |
|  | G13A | TACACATCTTACAAACTAATTTCA GGTAGTTGGAGCTGGTGC |
|  | G13C | TCAATCATAATCTCATAATCCAAT TGGTAGTTGGAGCTGGTTG |
|  | G13D | CAATTAACTACATACAATACATAC TGGTAGTTGGAGCTGGTGA |
|  | G13R | CTACTTCATATACTTTATACTACA GGTAGTTGGAGCTGGTCG |
|  | G13S | CTTTCAATTACAATACTCATTACA TGGTAGTTGGAGCTGGTAG |
|  | G13V | ATACCAATAATCCAATTCATATCA TGGTAGTTGGAGCTGGTGT |
| KRAS | WT | AATCATACCTTTCAATCTTTTACA ATTGCACTGTACTCCTCTTG |
| Exon3 | Q61H | TTCACTTTTCAATCAACTTTAATC CATTGCACTGTACTCCTCA |
|  | Q61K | TTACTTCACTTTCTATTTACAATC CATTGCACTGTACTCCTCTTT |
|  | Q61L | AATCTTACTACAAATCCTTTCTTT TCATTGCACTGTACTCCTCTA |

**Table 2 PCR primers used for the 56plex**

| Gene | Exon | Sequence, 5’→3’ | PCR product length (bp) | Sensitivity, % |
| --- | --- | --- | --- | --- |
| EGFR | 18 | TGGAGCCTCTTACACCCAGT | 123 | 5 |
|  |  | CTTATACACCGTGCCGAACG |  |  |
|  | 19 | CCAGAAGGTGAGAAAGTTAAAAT | 115 | 5 |
|  |  | ACCCCCACACAGCAAAGCAG |  |  |
|  | 20 | TCCAGGAAGCCTACGTGATG | 168 | 5 |
|  |  | TGAGCAGGTACTGGGAGCCA |  |  |
|  | 21 | ACCGCAGCATGTCAAGATCAC | 131 | 5 |
|  |  | CCCTGGTGTCAGGAAAATGCT |  |  |
| KRAS | 2 | ATAAACTTGTGGTAGTTGGAGCT | 153 | 5 |
|  |  | GTATCAAAGAATGGTCCTGCAC |  |  |
|  | 3 | ATCCAGACTGTGTTTCTCCCTT | 138 | 1 |
|  |  | AGTCCTCATGTACTGGTCCCT |  |  |

None declared.
